# Supplementary material for: Dietary Protein Regulates Female Estrous Cyclicity Partially via Fibroblast Growth Factor 21
Source: MDPI journal article supplement (doi:10.3390/nu15133049), 2023-07-06
Supplement: s1 [file s1]

## Supplementary tables

**Table S1.** Primer sequence for targeted genes.

|       | Gene           | Primer (5'-3')                                           |
|-------|----------------|----------------------------------------------------------|
| Rat   | <i>KiSS-1</i>  | F: GCTGCTGCTTCTCCTCTGTGT<br>R: CTGTTGGCCTGTGGGTTC        |
|       | <i>Gpr-54</i>  | F: GGAACCTCACTGGTCATCTTCGT<br>R: GTACGCAGCACAGAAGGAAAGT  |
|       | <i>Esr-1</i>   | F: GGCTGCGCAAGTGTTACGAA<br>R: CATTTTCGGCCTTCCAAGTCAT     |
|       | <i>Fshr</i>    | F: GAATGATGTCTTGGAAGTAATAG<br>R: CTTAATGCCTGTGTTGGA      |
|       | <i>LHcgr</i>   | F: AACAAATGCGAAAGCACAGTTAGA<br>R: GCACATTGGAGT GTCTTGGGT |
|       | <i>Fgf21</i>   | F: CCTGGAGCTCAAAGCCTTGA<br>R: AAACCTGCAGGCCTCAGGATC      |
|       | <i>β-actin</i> | F: CAACCGTGAAAAGATGACCCAG<br>R: ATGGGCACAGTGTGGGTGAC     |
| Mouse | <i>KiSS-1</i>  | F: CTCTGTGTCGCCACCTATGG<br>R: TTCCCAGGCATTAACGAGTTC      |
|       | <i>Gpr-54</i>  | F: CCGTCCAACGCTTCAGGAT<br>R: GTGTAGCGAAAAACAGGGGAA       |
|       | <i>Esr-1</i>   | F: CCCGCCTTCTACAGGTCTAAT<br>R: CTTTCTCGTTACTGCTGGACAG    |
|       | <i>Fshr</i>    | F: TCTGGGCCACTCGTTTTACAC<br>R: TTGCATTCCAGTTGCATGGC      |
|       | <i>LHcgr</i>   | F: ACGAGACGCTTTATTCTGCCA<br>R: AGGGGTACTTTGAAGGCAGC      |
|       | <i>Fgf21</i>   | F: CTGGGGGTCTACCAAGCATA<br>R: CACCCA GGATTGGAATGACC      |
|       | <i>Klb</i>     | F: CAACCCACTCCCATCTCGG<br>R: AGCACAGCTCA- GCGTAGTCC      |
|       | <i>Fgfr1</i>   | F: AGAGTCCAAGAGTAAAAGCAGC<br>R: CTTCCGAGGTTGAGCTCTCC     |
|       | <i>Cyp19a1</i> | F: CGGGCTACGTGGATGTGTT<br>R: GAGCTTGCCAGGCGTTAAAG        |
|       | <i>β-actin</i> | F: GGCTGTATTCCCCTCCATCG<br>R: CCAGTTGGTAACAATGCCATGT     |

*Gpr54*, G protein-coupled receptor 54; *IGF-1R*, insulin-like growth factor-1 receptor; *Esr-1*, estrogen receptor  $\alpha$ ; *Fshr*, follicle stimulating hormone receptor; *LHcgr*, luteinizing hormone/chorionic gonadotropin receptor; *Fgf21*, fibroblast growth factor 21; *Klb*,  $\beta$ Klotho; *Fgfr1*, fibroblast growth factor receptor 1; F, forward; R, reverse.

**Table S2.** Tissue development of rats after the re-feeding experiment <sup>1,2,3</sup>.

|         | Bodyweight | Ovary |       | Uterus |      | Fat pads |      | Liver |      |
|---------|------------|-------|-------|--------|------|----------|------|-------|------|
|         | (g)        | (g)   | (%)   | (g)    | (%)  | (g)      | (%)  | (g)   | (%)  |
| P4+P18  | 281.80     | 0.041 | 0.015 | 0.79   | 0.28 | 14.73    | 5.20 | 8.51  | 3.02 |
| P18+P18 | 287.96     | 0.051 | 0.018 | 0.80   | 0.27 | 14.98    | 5.18 | 8.59  | 2.98 |
| SEM     | 8.3        | 0.004 | 0.001 | 0.06   | 0.02 | 1.13     | 0.27 | 0.31  | 0.06 |

<sup>1</sup> P4+P18 denotes P4 rats with disturbed estrous cyclicity were re-fed by P18 diets. P18+P18 denotes P18 rats with normal estrous cyclicity were continued on their diets. <sup>2</sup> Values are expressed as means with standard errors of means, n= 5 or 6 rats per group. <sup>3</sup> % denotes tissue weight to body weight ratio expressed as percentage.

**Table S3.** Serum amino acid concentrations of rats after re-feeding experiment <sup>1,2</sup>.

| Amino Acid           | P18+P18 | P4+P18  | SEM   |
|----------------------|---------|---------|-------|
| Essential, µmol/L    |         |         |       |
| Threonine            | 478.98  | 481.17  | 12.31 |
| Valine               | 210.41  | 228.46  | 7.83  |
| Methionine           | 46.65   | 45.13   | 2.92  |
| Isoleucine           | 99.78   | 94.03   | 3.51  |
| Leucine              | 219.27  | 228.38  | 7.94  |
| Phenylalanine        | 71.37   | 67.66   | 4.17  |
| Lysine               | 612.97  | 529.08  | 52.98 |
| <b>Total</b>         | 1739.43 | 1673.91 | 61.30 |
| Nonessential, µmol/L |         |         |       |
| Asparagine           | 38.47   | 43.63   | 1.79  |
| Serine               | 302.07  | 309.92  | 18.01 |
| Glutamate            | 248.44  | 272.94  | 20.92 |
| Glycine              | 238.32  | 236.44  | 15.14 |
| Alanine              | 609.25  | 691.50  | 56.05 |
| Citrulline           | 82.96   | 81.11   | 5.60  |
| Tyrosine             | 70.81   | 85.92   | 6.67  |
| Ornithine            | 59.80   | 60.81   | 6.07  |
| Histidine            | 52.25   | 52.37   | 2.13  |
| Arginine             | 172.86  | 161.42  | 12.48 |
| Proline              | 238.37  | 234.04  | 14.30 |
| Total                | 2113.59 | 2165.84 | 97.16 |
| EAA/NEAA             | 0.83    | 0.78    | 0.03  |

<sup>1</sup> P4+P18 denotes P4 rats with disturbed estrous cyclicity were re-fed by P18 diets. P18+P18 denotes P18 rats with normal estrous cyclicity were continued on their diets. <sup>2</sup> Values are expressed as means with standard errors of means, n= 5 or 6 rats per group.

## Supplemental Figures

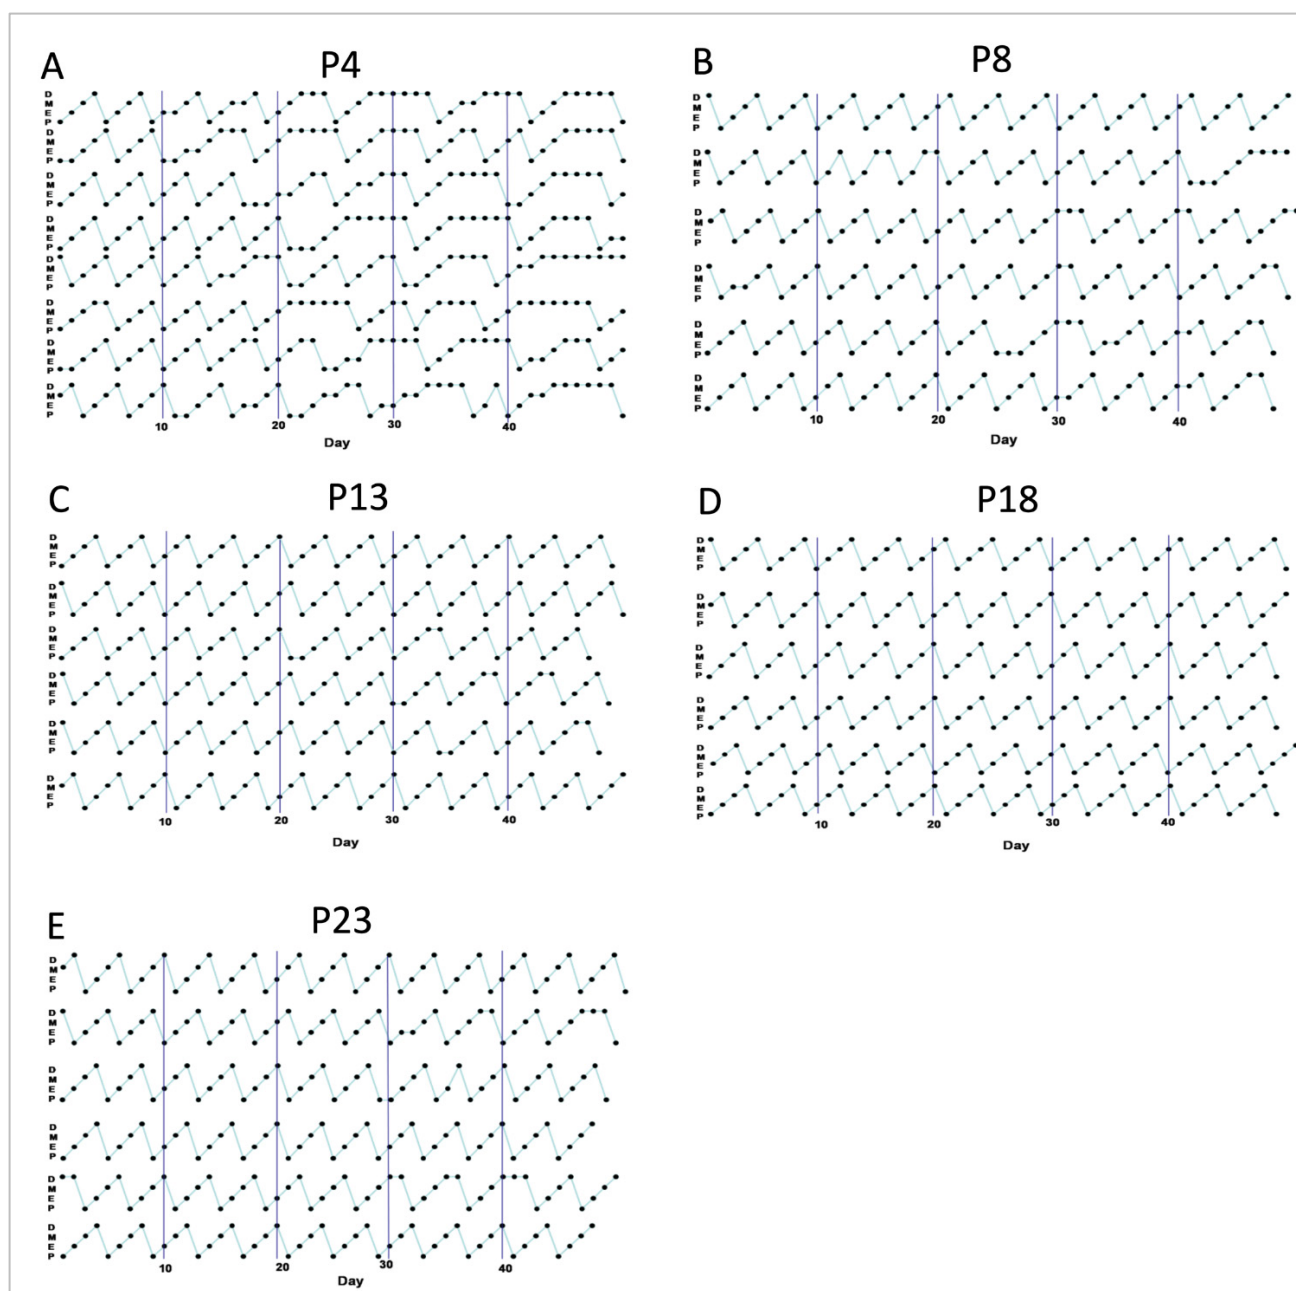

**Figure S1.** Oestrus cyclicity of rats fed varied amount of protein. P4, P8, P13, P18, and P23 denote dietary protein content at the level of 4%, 8%, 13%, 18%, and 23%. P, proestrus; E, estrus; M, metestrus; D, diestrus.
